# Supplementary material
Source: Springer Nature journal article supplement (https://www.springermedizin.de/resource/supplementary/12936_2014_3166_MOESM4_ESM.pdf/9545264)

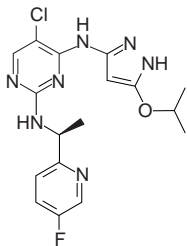

AZ-1 or AZD1332

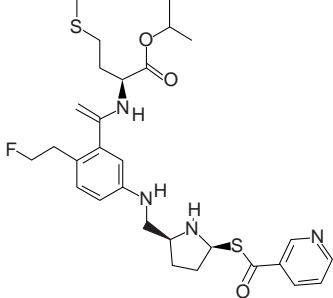

AZ-3 or AZD3409

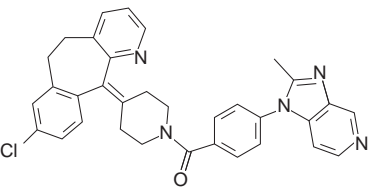

UK-112,214

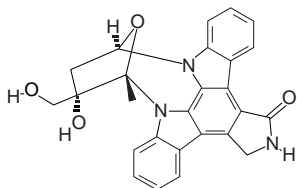

Lestaurtinib (CEP-701)

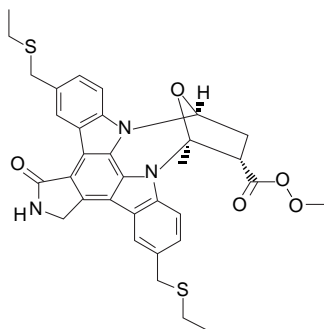

CEP-1347

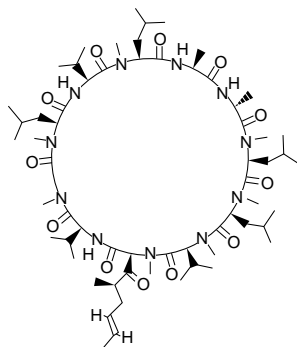

PSC833 (valsopodar)

Supplement: MOESM4 [file 9545264]
